# Supplementary material for: A cyano-bridged tubular coordination polymer with dominant ferromagnetic interactions
Source: Royal Society of Chemistry journal article supplement (doi:10.1039/c4dt02056a), 2014-10-31
Supplement: c4dt02056a1.pdf [file c4dt02056a1.pdf]

## A cyano-bridged tubular coordination polymer with dominant ferromagnetic interactions

Peng-Fei Zhuang, Tao Liu,\* Xian-Hui Xie, Cheng He, and Chun-Ying Duan

State Key Laboratory of Fine Chemicals, Dalian University of Technology, Dalian, 116024, China

E-mail address: liutao@dlut.edu.cn; Tel: +86-411-84986316; fax: +86-411-84986314.

**Synthesis of 1:** A 3.0 mL aqueous solution of  $K_2[Fe^{II}(bipy)(CN)_4] \cdot 3H_2O$  (0.05 mmol) was placed at the bottom in one side of an H-shaped tube, and a 3.0 mL aqueous solution of  $Mn(ClO_4)_2 \cdot 6H_2O$  (0.05 mmol) was introduced into the other side. Then, 12 mL of water was layered over the solutions on both sides to provide a diffusion pathway. Four or five weeks later, red crystals appeared and were collected and dried in air after quickly being washed with water. Yield: 46% based on  $Mn(ClO_4)_2 \cdot 6H_2O$ . Anal. calcd (%) for  $C_{14}H_{12}MnFeN_6O_2$ : C, 41.31; H, 2.97; N, 20.65; Found (%): C, 41.21; H, 2.85; N, 20.51. The dehydrated sample was obtained via heating the hydrated sample at 120°C for 12 hours.

**Crystal structure analysis:** The data were collected at a temperature of  $296 \pm 2$  K on a Bruker Smart APEX II X-diffractometer equipped with graphite monochromated Mo-K $\alpha$  radiation ( $\lambda = 0.71073$  Å) using the SMART and SAINT programs. The structure was solved in the space group  $P-1$  by direct method and refined by the full-matrix least-squares fitting on  $F^2$  using SHELXTL.<sup>S1</sup> All non-hydrogen atoms were treated anisotropically. Hydrogen atoms of organic ligands were generated geometrically, Hydrogen atoms of O1 were added by difference Fourier maps. All hydrogen atoms were refined by a riding model.

<sup>S1</sup>: (a) Sheldrick, G.M. (2008). Acta Cryst. A64, 112-122; (b) Dolomanov, O.V., Bourhis, L.J., Gildea, R.J., Howard, J.A.K. & Puschmann, H. (2009), J. Appl. Cryst. 42, 339-341.

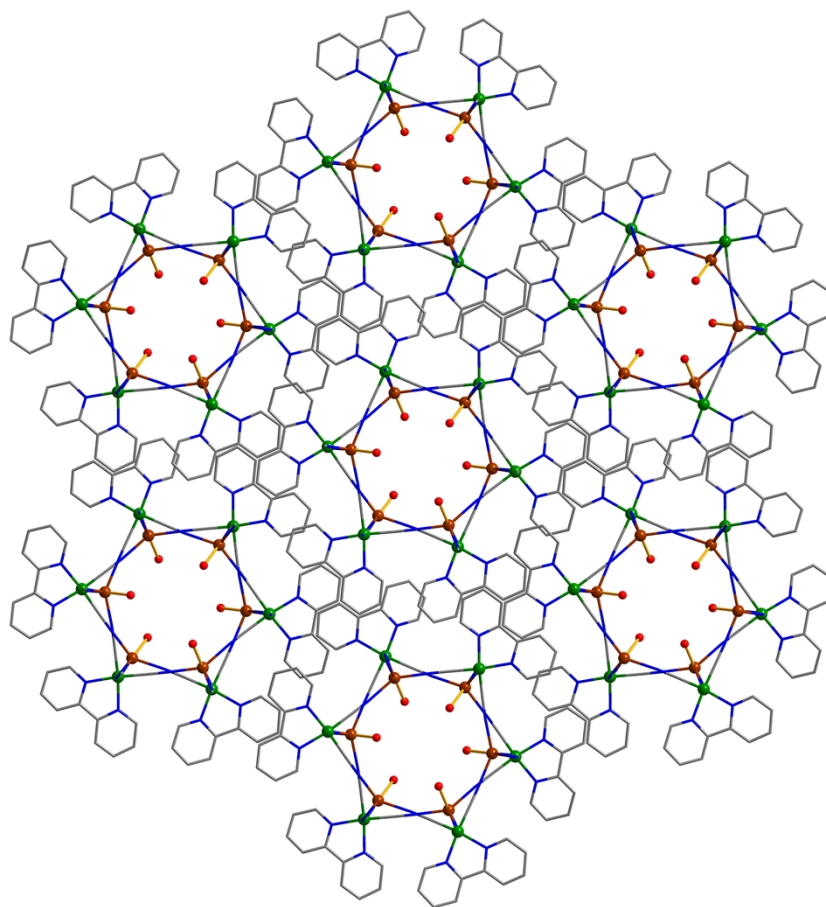

**Figure S1** Packing diagram of **1** in the *ab* plane. H and O atoms are omitted for clarity (Fe green, Mn brown, C gray, N blue).

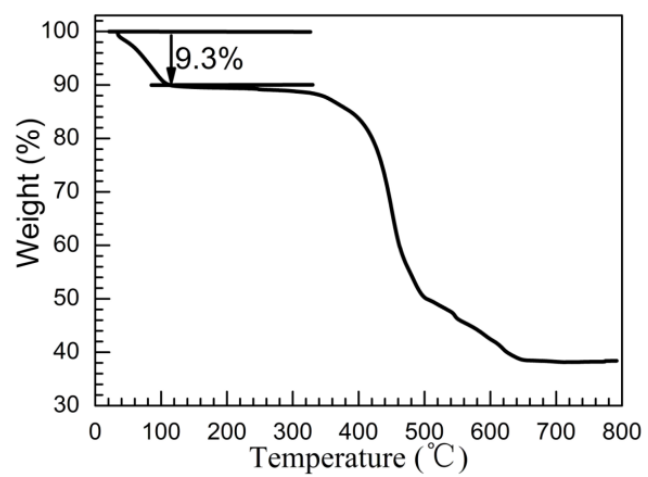

**Figure S2** Thermal gravimetric analyses of **1** under a N<sub>2</sub> atmosphere.

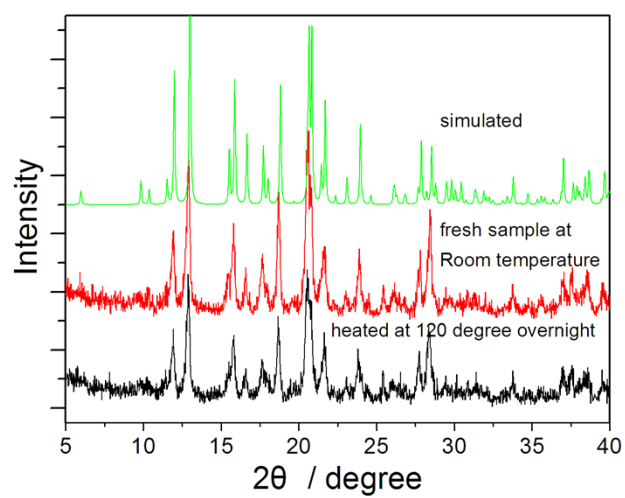

**Figure S3** The experimental powder XRD pattern and the simulated XRD pattern of **1**.

**Table S1** Selected bond lengths (Å) and angles (°) for **1**.

---

| Complex <b>1</b>  |            |                     |            |
|-------------------|------------|---------------------|------------|
| Fe(1)-C(12)       | 1.887(4)   | Mn(2)-N(5)#1        | 2.115(4)   |
| Fe(1)-C(13)       | 1.886(4)   | Mn(2)-N(4)#2        | 2.122(4)   |
| Fe(1)-C(11)       | 1.918(4)   | Mn(2)-N(3)#3        | 2.143(3)   |
| Fe(1)-C(14)       | 1.929(4)   | Mn(2)-N(6)          | 2.166(3)   |
| Fe(1)-N(2)        | 1.985(3)   | Mn(2)-O(1)          | 2.363(3)   |
| Fe(1)-N(1)        | 1.995(3)   |                     |            |
|                   |            |                     |            |
| C(13)-Fe(1)-C(12) | 90.72(17)  | C(14)-Fe(1)-N(1)    | 92.70(14)  |
| C(12)-Fe(1)-C(11) | 91.59(15)  | N(2)-Fe(1)-N(1)     | 80.08(14)  |
| C(13)-Fe(1)-C(11) | 90.67(16)  | N(5)#1-Mn(2)-N(4)#2 | 143.52(16) |
| C(12)-Fe(1)-C(14) | 86.03(15)  | N(5)#1-Mn(2)-N(3)#3 | 92.33(13)  |
| C(13)-Fe(1)-C(14) | 86.66(15)  | N(4)#2-Mn(2)-N(3)#3 | 90.78(13)  |
| C(11)-Fe(1)-C(14) | 176.39(16) | N(5)#1-Mn(2)-N(6)   | 104.54(14) |
| C(12)-Fe(1)-N(2)  | 93.92(15)  | N(4)#2-Mn(2)-N(6)   | 108.62(13) |
| C(13)-Fe(1)-N(2)  | 175.37(16) | N(3)#3-Mn(2)-N(6)   | 109.33(13) |
| C(11)-Fe(1)-N(2)  | 89.23(13)  | N(5)#1-Mn(2)-O(1)   | 84.58(13)  |
| C(14)-Fe(1)-N(2)  | 93.63(13)  | N(4)#2-Mn(2)-O(1)   | 84.20(12)  |
| C(12)-Fe(1)-N(1)  | 173.78(16) | N(3)#3-Mn(2)-O(1)   | 166.72(13) |
| C(13)-Fe(1)-N(1)  | 95.29(17)  | N(6)-Mn(2)-O(1)     | 83.95(12)  |
| C(11)-Fe(1)-N(1)  | 89.95(14)  |                     |            |

---

<sup>a</sup> Symmetry transformations used to generate equivalent atoms for **1**: #1  $x-y+1/3, x-1/3, -z+2/3$ ; #2  $y+1/3, -x+y+2/3, -z+2/3$ ; #3  $x, y, z-1$ .
